# Supplementary material
Source: PubMed Central journal article supplement (PMC7536623)
Supplement: jamapediatr-e203375-s002.pdf [file jamapediatr-e203375-s002.pdf]

## Data Sharing Statement

Eakin. Effectiveness of a Home- and School-Based Asthma Educational Program for Head Start Children With Asthma. *JAMA Pediatr*. Published October 05, 2020.  
10.1001/jamapediatrics.2020.3375

### Data

**Data available:** Yes

**Data types:** Deidentified participant data

**How to access data:** [meakin1@jhmi.edu](mailto:meakin1@jhmi.edu)

**When available:** With publication

### Supporting Documents

**Document types:** None

### Additional Information

**Who can access the data:** Researchers whose proposed use of the data is approved

**Types of analyses:** for research purposes

**Mechanisms of data availability:** after approval of a proposal and signed data use agreement
